# Supplementary material
Source: publisher site journal article supplement (https://www.dovepress.com/get_supplementary_file.php?f=350194.docx)
Supplement: Supplementary file 1 [file get_supplementary_file.php]

**Supplementary Materials**

**Table S1** Primary (at admission) and secondary laboratory workups of the first patient

|  | **WBC** | **RBC** | **HB** | **PLT** |
| --- | --- | --- | --- | --- |
| 9-Apr-2020 | 3.73 | 3.12 | 95 | 190 |
| 16-Apr-2020 | 5.8 | 2.93 | 88 | 169 |
| 26-Apr-2020 | 4.05 | 2.65 | 80 | 86 |
| 30-Apr-2020 | 1.71 | 2.38 | 71 | 13 |
| 1-May-2020 | 0.49 | 1.88 | 56 | 2 |
| 2-May-2020 | 1.08 | 1.64 | 50 | 4 |
| 5-May-2020 | 18.29 | 2.44 | 73 | 12 |
| 6-May-2020 | 56.35 | 2.21 | 66 | 15 |
| 14-May-2020 | 31.57 | 2.34 | 72 | 134 |
| 29-May-2020 | 10 | 3.33 | 109 | 349 |
| 4-Jun-2020 | 7.57 | 3.44 | 114 | 208 |
| 19-Jun-2020 | 8.67 | 3.95 | 131 | 215 |
| 9-Jul-2020 | 7.75 | 4.1 | 137 | 225 |
| **Normal values** | 3.5-9.5 | 3.8-5.1 | 115-150 | 125-350 |
| **Unit** | 109/l | 1012/l | g/l | 109/l |

**Table S2** Primary (at admission) and secondary laboratory workups of the second patient

|  | **WBC** | **RBC** | **HB** | **PLT** |
| --- | --- | --- | --- | --- |
| 9-Apr-2020 | 3.38 | 2.34 | 81 | 111 |
| 18-Apr-2020 | 3.01 | 1.8 | 62 | 67 |
| 22-Apr-2020 | 1.22 | 1.56 | 55 | 64 |
| 26-Apr-2020 | 0.93 | 1.84 | 61 | 38 |
| 27-Apr-2020 | 5.99 | 1.95 | 66 | 33 |
| 29-Apr-2020 | 11.58 | 1.94 | 65 | 35 |
| 5-May-2020 | 59.69 | 2.06 | 71 | 110 |
| 16-May-2020 | 16.08 | 2.23 | 78 | 107 |
| 23-May-2020 | 12.86 | 2.34 | 82 | 108 |
| 29-May-2020 | 7.22 | 2.48 | 87 | 117 |
| 7-Jun-2020 | 7.88 | 2.64 | 91 | 106 |
| 15-Jun-2020 | 7.87 | 2.89 | 101 | 126 |
| **Normal values** | 3.5-9.5 | 3.8-5.1 | 115-150 | 125-350 |
| **Unit** | 109/l | 1012/l | g/l | 109/l |

**Abbreviations:** WBC, White blood cell; RBC, Red blood cell; HB, Hemoglobin; PLT, Platelets.

**Table S3** ADR probability scale

To assess the adverse drug reaction, please answer the following questionnaire and give the pertinent score.

Yes No Do not know Score

1. Are there previous conclusive reports on this reaction? +1 0 0

2. Did the adverse event appear after the suspected drug

was administered? +2 -1 0

1. Did the adverse reaction improve when the drug was

discontinued or a specific antagonist was administered? +1 0 0

1. Did the adverse reaction reappear when the drug was

readministered? +2 -1 0

1. Are there alternative causes (other than the drug) that

could on their own have caused the reaction? -1 +2 0

1. Did the reaction reappear when a placebo was given? -1 +1 0

7. Was the drug detected in the blood (or other fluids) in

concentrations known to be toxic? +1 0 0

8. Was the reaction more severe when the dose was

increased, or less severe when the dose was decreased? +1 0 0

9. Did the patient have a similar reaction to the same or

similar drugs in any previous exposure? +1 0 0

10. Was the adverse event confirmed by any objective

evidence? +1 0 0

Total score

**Notes:** The ADR was assigned to a probability category from the total score as follows: definite ≥ 9, probable 5 to 8, possible 1 to 4, doubtful ≤ 0.

Reprinted with permission from Naranjo C, Busto U, Sellers E, et al. A method for estimating the probability of adverse drug reactions. Clin Pharmacol Ther. 1981;30:239–245. © 1981 American Society for Clinical Pharmacology and Therapeutics.9
